# Supplementary material for: Peptidomics-based study of antihypertensive activity: discovery of novel ACE inhibiting peptides from peanut yogurt
Source: Royal Society of Chemistry journal article supplement (doi:10.1039/d4fo00299g), 2024-01-01
Supplement: d4fo00299g1.pdf [file d4fo00299g1.pdf]

**Supplementary Table 1**

| Predictive | scoring    | of                      | peptide             | activity            | and | its | related | information. |
|------------|------------|-------------------------|---------------------|---------------------|-----|-----|---------|--------------|
| Number     | Peptides   | Probability of activity | Homologous proteins | Molecular mass (Da) |     |     |         |              |
| 1          | PFKFF      | 0.9861                  | A0A445CPR7_ARAHY    | 684.3635            |     |     |         |              |
| 2          | NPFKFF     | 0.9783                  | A0A445CPR7_ARAHY    | 798.4064            |     |     |         |              |
| 3          | NNPFKFF    | 0.9730                  | A0A445CPR7_ARAHY    | 912.4493            |     |     |         |              |
| 4          | LLRFF      | 0.9678                  | CASA1_BOVIN         | 694.4166            |     |     |         |              |
| 5          | QPPSPPPFL  | 0.9665                  | A0A444X8W9_ARAHY    | 1075.5702           |     |     |         |              |
| 6          | LIRFF      | 0.9587                  | A0A444XJY2_ARAHY    | 694.4166            |     |     |         |              |
| 7          | PPPPP      | 0.9561                  | A0A444ZWK8_ARAHY    | 503.2744            |     |     |         |              |
| 8          | RGPPF      | 0.9559                  | CASB_BOVIN          | 572.3071            |     |     |         |              |
| 9          | NPFKF      | 0.9481                  | A0A445CPR7_ARAHY    | 651.338             |     |     |         |              |
| 10         | NNPFKF     | 0.9380                  | A0A445CPR7_ARAHY    | 765.3809            |     |     |         |              |
| 11         | FLPYPY     | 0.9361                  | CASK_BOVIN          | 798.3952            |     |     |         |              |
| 12         | MPFPK      | 0.9331                  | CASB_BOVIN          | 618.3199            |     |     |         |              |
| 13         | TWDFPLP    | 0.9319                  | A0A3Q1N1W0_BOVIN    | 874.4225            |     |     |         |              |
| 14         | FYFPSR     | 0.9298                  | NING13_ARAHY        | 815.3966            |     |     |         |              |
| 15         | FYFPSRR    | 0.9254                  | NING13_ARAHY        | 971.4977            |     |     |         |              |
| 16         | QPSYFPF    | 0.9173                  | EIBKM4_BOVIN        | 834.3912            |     |     |         |              |
| 17         | NNNPFKF    | 0.9104                  | A0A445CPR7_ARAHY    | 879.4239            |     |     |         |              |
| 18         | FLPYPHY    | 0.9094                  | CASK_BOVIN          | 961.4585            |     |     |         |              |
| 19         | FVAPFP     | 0.9075                  | CASA1_BOVIN         | 676.3584            |     |     |         |              |
| 20         | LKNNNPFKFF | 0.8953                  | A0A445CPR7_ARAHY    | 1267.6713           |     |     |         |              |
| 21         | FYPELFR    | 0.8943                  | CASA1_BOVIN         | 970.4912            |     |     |         |              |
| 22         | GGGYGPPPPP | 0.8894                  | A0A444YDJ3_ARAHY    | 894.4235            |     |     |         |              |
| 23         | FPKYP      | 0.8861                  | CASB_BOVIN          | 650.3428            |     |     |         |              |
| 24         | VYPFP      | 0.8845                  | CASB_BOVIN          | 621.3162            |     |     |         |              |
| 25         | MPFPKYP    | 0.8841                  | CASB_BOVIN          | 878.436             |     |     |         |              |
| 26         | VYPFPGP    | 0.8792                  | CASB_BOVIN          | 775.3904            |     |     |         |              |

---

|    |                 |        |                  |           |
|----|-----------------|--------|------------------|-----------|
| 27 | GPVRGPF         | 0.8779 | CASB_BOVIN       | 728.3969  |
| 28 | AMKPW           | 0.8777 | CASA2_BOVIN      | 631.3152  |
| 29 | APFPEVF         | 0.8744 | CASA1_BOVIN      | 805.401   |
| 30 | PFPKYP          | 0.8741 | CASB_BOVIN       | 747.3955  |
| 31 | DGPSSKDWRGGR    | 0.8738 | A0A445DWQ9_ARAHY | 1316.6221 |
| 32 | FPGPIH          | 0.8685 | A0A452DHW7_BOVIN | 666.3489  |
| 33 | GPVRGPF         | 0.8676 | CASB_BOVIN       | 825.4497  |
| 34 | APFPEVFG        | 0.8612 | CASA1_BOVIN      | 862.4225  |
| 35 | LNYPYAPFP       | 0.8526 | A0A3Q1LX31_BOVIN | 1177.5807 |
| 36 | QFLPYPPY        | 0.8515 | CASK_BOVIN       | 1089.5171 |
| 37 | LHRFL           | 0.8454 | F1MI39_BOVIN     | 684.4071  |
| 38 | VRGPF           | 0.8439 | CASB_BOVIN       | 671.3755  |
| 39 | PVRGPF          | 0.8436 | CASB_BOVIN       | 768.4282  |
| 40 | YFPGPIH         | 0.8436 | A0A452DHW7_BOVIN | 926.465   |
| 41 | GRQPGDYDDRRQP   | 0.8414 | NING13_ARAHY     | 2514.1819 |
|    | RREEGGR         |        |                  |           |
| 42 | SLVYFP          | 0.8400 | CASB_BOVIN       | 821.4323  |
| 43 | FVAPFPEVFGK     | 0.8368 | CASA1_BOVIN      | 1236.6542 |
| 44 | YFPSRR          | 0.8365 | NING13_ARAHY     | 824.4293  |
| 45 | FPKYPVEPF       | 0.8316 | CASB_BOVIN       | 1122.575  |
| 46 | FGRLF           | 0.8301 | B3IXL2_ARAHY     | 767.3966  |
| 47 | APFPEVFGK       | 0.8298 | CASA1_BOVIN      | 990.5174  |
| 48 | QFRPR           | 0.8242 | A6QLC0_BOVIN     | 702.3925  |
| 49 | QEPVLGPVRGPFPIV | 0.8187 | CASB_BOVIN       | 1716.9926 |
| 50 | GPVRGPFPIV      | 0.8185 | CASB_BOVIN       | 1150.6862 |
| 51 | MPIQAF          | 0.8181 | CASB_BOVIN       | 818.436   |
| 52 | PGPSPTR         | 0.8181 | A0A3Q1MTR8_BOVIN | 807.4239  |
| 53 | GPFPPIV         | 0.8150 | CASB_BOVIN       | 741.4425  |
| 54 | NENLLRFF        | 0.8146 | CASA1_BOVIN      | 1051.545  |

---

|    |            |        |                  |           |
|----|------------|--------|------------------|-----------|
| 55 | IPPLR      | 0.8077 | A0A445DCJ9_ARAHY | 594.3853  |
| 56 | DQFPRR     | 0.8040 | A0A445CPR7_ARAHY | 817.4194  |
| 57 | WAKYLGRSFR | 0.8013 | A0A445DSD6_ARAHY | 1282.6935 |
| 58 | LPYPYY     | 0.8002 | CASK_BOVIN       | 814.3901  |

### Supplementary Table 2

Pathways involved in differential proteins.

| Number | ID            | Pathways                                                  | Number of proteins |
|--------|---------------|-----------------------------------------------------------|--------------------|
| 1      | path:bta04611 | Platelet activation                                       | 7                  |
| 2      | path:bta03010 | Ribosome                                                  | 7                  |
| 3      | path:bta04612 | Antigen processing and presentation                       | 7                  |
| 4      | path:bta04141 | Protein processing in endoplasmic reticulum               | 7                  |
| 5      | path:bta05417 | Lipid and atherosclerosis                                 | 7                  |
| 6      | path:bta04810 | Regulation of actin cytoskeleton                          | 6                  |
| 7      | path:bta00010 | Glycolysis / Gluconeogenesis                              | 6                  |
| 8      | path:bta04144 | Endocytosis                                               | 6                  |
| 9      | path:bta04971 | Gastric acid secretion                                    | 5                  |
| 10     | path:bta04142 | Lysosome                                                  | 5                  |
| 11     | path:bta04015 | Rap1 signaling pathway                                    | 5                  |
| 12     | path:bta04613 | Neutrophil extracellular trap formation                   | 5                  |
| 13     | path:bta05418 | Fluid shear stress and atherosclerosis                    | 5                  |
| 14     | path:bta03320 | PPAR signaling pathway                                    | 5                  |
| 15     | path:bta00052 | Galactose metabolism                                      | 5                  |
| 16     | path:bta04670 | Leukocyte transendothelial migration                      | 5                  |
| 17     | path:bta04151 | PI3K-Akt signaling pathway                                | 5                  |
| 18     | path:bta04066 | HIF-1 signaling pathway                                   | 4                  |
| 19     | path:bta04010 | MAPK signaling pathway                                    | 4                  |
| 20     | path:bta04961 | Endocrine and other factor-regulated calcium reabsorption | 4                  |
| 21     | path:bta04270 | Vascular smooth muscle contraction                        | 3                  |

---

|    |               |                                              |   |
|----|---------------|----------------------------------------------|---|
| 22 | path:bta04022 | cGMP-PKG signaling pathway                   | 3 |
| 23 | path:bta00380 | Tryptophan metabolism                        | 3 |
| 24 | path:bta04979 | Cholesterol metabolism                       | 3 |
| 25 | path:bta04146 | Peroxisome                                   | 3 |
| 26 | path:bta04068 | FoxO signaling pathway                       | 3 |
| 27 | path:bta00562 | Inositol phosphate metabolism                | 3 |
| 28 | path:bta04722 | Neurotrophin signaling pathway               | 3 |
| 29 | path:bta04120 | Ubiquitin mediated proteolysis               | 3 |
| 30 | path:bta04261 | Adrenergic signaling in cardiomyocytes       | 2 |
| 31 | path:bta04911 | Insulin secretion                            | 2 |
| 32 | path:bta00561 | Glycerolipid metabolism                      | 2 |
| 33 | path:bta04978 | Mineral absorption                           | 2 |
| 34 | path:bta04024 | cAMP signaling pathway                       | 2 |
| 35 | path:bta00310 | Lysine degradation                           | 2 |
| 36 | path:bta00980 | Metabolism of xenobiotics by cytochrome P450 | 2 |
| 37 | path:bta04080 | Neuroactive ligand-receptor interaction      | 2 |
| 38 | path:bta04110 | Cell cycle                                   | 2 |
| 39 | path:bta04974 | Protein digestion and absorption             | 2 |
| 40 | path:bta00051 | Fructose and mannose metabolism              | 2 |
| 41 | path:bta04514 | Cell adhesion molecules                      | 2 |
| 42 | path:bta04070 | Phosphatidylinositol signaling system        | 2 |
| 43 | path:bta04152 | AMPK signaling pathway                       | 2 |
| 44 | path:bta00620 | Pyruvate metabolism                          | 2 |
| 45 | path:bta04973 | Carbohydrate digestion and absorption        | 2 |
| 46 | path:bta00330 | Arginine and proline metabolism              | 2 |
| 47 | path:bta04724 | Glutamatergic synapse                        | 2 |
| 48 | path:bta04972 | Pancreatic secretion                         | 2 |
| 49 | path:bta04925 | Aldosterone synthesis and secretion          | 2 |
| 50 | path:bta00030 | Pentose phosphate pathway                    | 2 |

---

---

|    |               |                                                            |   |
|----|---------------|------------------------------------------------------------|---|
| 51 | path:bta03013 | Nucleocytoplasmic transport                                | 2 |
| 52 | path:bta04910 | Insulin signaling pathway                                  | 2 |
| 53 | path:bta04620 | Toll-like receptor signaling pathway                       | 2 |
| 54 | path:bta05415 | Diabetic cardiomyopathy                                    | 2 |
| 55 | path:bta04064 | NF-kappa B signaling pathway                               | 2 |
| 56 | path:bta00500 | Starch and sucrose metabolism                              | 2 |
| 57 | path:bta00410 | beta-Alanine metabolism                                    | 1 |
| 58 | path:bta04020 | Calcium signaling pathway                                  | 1 |
| 59 | path:bta04512 | ECM-receptor interaction                                   | 1 |
| 60 | path:bta04933 | AGE-RAGE signaling pathway in diabetic complications       | 1 |
| 61 | path:bta04062 | Chemokine signaling pathway                                | 1 |
| 62 | path:bta04750 | Inflammatory mediator regulation of TRP channels           | 1 |
| 63 | path:bta04672 | Intestinal immune network for IgA production               | 1 |
| 64 | path:bta04260 | Cardiac muscle contraction                                 | 1 |
| 65 | path:bta00280 | Valine, leucine and isoleucine degradation                 | 1 |
| 66 | path:bta04960 | Aldosterone-regulated sodium reabsorption                  | 1 |
| 67 | path:bta04662 | B cell receptor signaling pathway                          | 1 |
| 68 | path:bta04728 | Dopaminergic synapse                                       | 1 |
| 69 | path:bta04310 | Wnt signaling pathway                                      | 1 |
| 70 | path:bta00270 | Cysteine and methionine metabolism                         | 1 |
| 71 | path:bta04927 | Cortisol synthesis and secretion                           | 1 |
| 72 | path:bta00520 | Amino sugar and nucleotide sugar metabolism                | 1 |
| 73 | path:bta04071 | Sphingolipid signaling pathway                             | 1 |
| 74 | path:bta04726 | Serotonergic synapse                                       | 1 |
| 75 | path:bta04666 | Fc gamma R-mediated phagocytosis                           | 1 |
| 76 | path:bta00601 | Glycosphingolipid biosynthesis - lacto and neolacto series | 1 |
| 77 | path:bta00340 | Histidine metabolism                                       | 1 |
| 78 | path:bta04371 | Apelin signaling pathway                                   | 1 |
| 79 | path:bta04610 | Complement and coagulation cascades                        | 1 |

---

|    |               |                                          |   |
|----|---------------|------------------------------------------|---|
| 80 | path:bta04926 | Relaxin signaling pathway                | 1 |
| 81 | path:bta00040 | Pentose and glucuronate interconversions | 1 |
| 82 | path:bta00020 | Citrate cycle (TCA cycle)                | 1 |
| 83 | path:bta04924 | Renin secretion                          | 1 |
| 84 | path:bta04659 | Th17 cell differentiation                | 1 |
| 85 | path:bta04922 | Glucagon signaling pathway               | 1 |
| 86 | path:bta00260 | Glycine, serine and threonine metabolism | 1 |
| 87 | path:bta04657 | IL-17 signaling pathway                  | 1 |
| 88 | path:bta00480 | Glutathione metabolism                   | 1 |

### Supplementary Table 3

Complete results for molecular docking affinity and property prediction.

| Number | Peptides         | Affinity | Isoelectric point | Hydrophilic | Hydrophobicity | SVM   |
|--------|------------------|----------|-------------------|-------------|----------------|-------|
| 1      | LNYPPAYPPF       | -11.0    | 5.52              | -0.41       | 5.43           | -0.47 |
| 2      | QPPSPPPFL        | -10.9    | 5.52              | -0.73       | 7.01           | -0.62 |
| 3      | FLPYPY           | -10.9    | 5.52              | 0.133       | 3.8            | -0.77 |
| 4      | YFPGPIH          | -10.8    | 6.74              | -0.3        | 8.26           | -0.74 |
| 5      | GGGYGPPPPP       | -10.6    | 5.52              | -1.09       | 12.49          | -0.31 |
| 6      | APFPEVFGK        | -10.6    | 6.05              | 0.067       | 12.38          | -1.17 |
| 7      | QEPVLGPVRGPFPIIV | -10.2    | 6.00              | 0.594       | 10.39          | -1.02 |
| 8      | VYFPGP           | -10.1    | 5.49              | 0.071       | 6.59           | -0.66 |
| 9      | NNPKFF           | -10.0    | 8.75              | -0.586      | 7.41           | -0.47 |
| 10     | APFPEVF          | -9.9     | 4.00              | 0.7         | 8.43           | -1.11 |
| 11     | APFPEVFG         | -9.9     | 4.00              | 0.562       | 9.58           | -1.19 |
| 12     | QPSYPPF          | -9.8     | 5.52              | -1.086      | 7.13           | -0.86 |
| 13     | QFRPR            | -9.8     | 12                | -2.26       | 10.72          | -0.87 |
| 14     | WAKYLGRSFR       | -9.8     | 11                | -0.79       | 10.67          | -1.09 |
| 15     | RGPF             | -9.7     | 9.75              | -1.06       | 9.43           | -0.81 |
| 16     | PFPKYP           | -9.7     | 9.01              | -1.2        | 8.70           | -0.6  |

|    |                     |      |       |        |       |       |
|----|---------------------|------|-------|--------|-------|-------|
| 17 | QFLPYPPY            | -9.7 | 5.52  | -0.5   | 3.86  | -0.46 |
| 18 | SLVYPPF             | -9.7 | 5.24  | 0.786  | 4.51  | -0.87 |
| 19 | DQFPRR              | -9.6 | 9.6   | -2.467 | 14.36 | -0.93 |
| 20 | NPFKFF              | -9.5 | 8.75  | -0.1   | 6.56  | -0.56 |
| 21 | LKNNNPFKFF          | -9.5 | 10    | -0.77  | 9.81  | -0.62 |
| 22 | TWDFPLP             | -9.4 | 3.8   | -0.243 | 7.02  | -0.9  |
| 23 | NNNPFKF             | -9.4 | 8.75  | -1.486 | 9.97  | -0.65 |
| 24 | MPFPKYP             | -9.4 | 8.34  | -0.757 | 8.03  | -0.9  |
| 25 | PGPSPTPR            | -9.4 | 10.18 | -1.6   | 12.13 | -0.94 |
| 26 | LLRFF               | -9.3 | 9.75  | 1.74   | 3.79  | -0.94 |
| 27 | LIRFF               | -9.3 | 9.75  | 1.88   | 3.92  | -0.73 |
| 28 | FYFPSRR             | -9.3 | 10.84 | -1.014 | 7.99  | -1.06 |
| 29 | PVRGPF              | -9.3 | 10.18 | -0.386 | 9.11  | -0.95 |
| 30 | IPPLR               | -9.3 | 9.75  | 0.12   | 7.62  | -0.46 |
| 31 | PFKFF               | -9.2 | 9.18  | 0.58   | 5.71  | -0.73 |
| 32 | FYPELFR             | -9.2 | 6     | -0.214 | 8.1   | -1.07 |
| 33 | FPKYP               | -9.2 | 8.59  | -1.12  | 8.56  | -0.57 |
| 34 | VYPPF               | -9.2 | 5.49  | 0.5    | 5.3   | -0.8  |
| 35 | FPGPIH              | -9.2 | 6.74  | 0.083  | 8.83  | -0.79 |
| 36 | GRQPGDYDDRRQPRREGGR | -9.2 | 6.27  | -2.91  | 46.29 | -0.81 |
| 37 | FGRLF               | -9.1 | 6.00  | 0.167  | 9.82  | -0.71 |
| 38 | YFPSRR              | -9   | 10.84 | -1.65  | 9.7   | -0.92 |
| 39 | PPPPP               | -8.9 | 5.96  | -1.6   | 8.6   | -0.55 |
| 40 | NPFKF               | -8.9 | 8.75  | -0.68  | 8.27  | -0.67 |
| 41 | DGPSSKDWRGGR        | -8.9 | 8.75  | -2.1   | 24.02 | -0.55 |
| 42 | NNPFKF              | -8.8 | 8.75  | -1.15  | 9.12  | -0.58 |
| 43 | FYFPSR              | -8.8 | 8.75  | -0.433 | 6.18  | -0.91 |
| 44 | VRGPF               | -8.8 | 9.72  | -0.183 | 8.97  | -0.88 |
| 45 | NENLLRFF            | -8.8 | 6.00  | -0.225 | 9.12  | -0.88 |

|    |           |      |      |        |       |       |
|----|-----------|------|------|--------|-------|-------|
| 46 | FPKYPVEPF | -8.6 | 6.00 | -0.411 | 10.16 | -0.78 |
| 47 | MPFPK     | -8.4 | 8.5  | -0.48  | 8.60  | -1.09 |
| 48 | AMKPW     | -8.4 | 8.8  | -0.54  | 8.58  | -0.72 |
| 49 | LHRFL     | -8.1 | 9.76 | 0.54   | 7.83  | -0.48 |

#### Supplementary Table 4

Molecular docking affinity and property prediction results

| Number | peptides   | affinity | Isoelectric point | Hydrophilic | Hydrophobicity | SVM <sup>1</sup> |
|--------|------------|----------|-------------------|-------------|----------------|------------------|
| 1      | LNYPAYPFP  | -11.0    | 5.52              | -0.41       | 5.43           | -0.47            |
| 2      | QPPSPPPFL  | -10.9    | 5.52              | -0.73       | 7.01           | -0.62            |
| 3      | FLPYPY     | -10.9    | 5.52              | 0.133       | 3.8            | -0.77            |
| 4      | YFPFGPIH   | -10.8    | 6.74              | -0.3        | 8.26           | -0.74            |
| 5      | GGGYGPPPPP | -10.6    | 5.52              | -1.09       | 12.49          | -0.31            |
| 6      | APFPEVFGK  | -10.6    | 6.05              | 0.067       | 12.38          | -1.17            |

\* The lower the value of the affinity, the more stable the conformation of the complex formed after binding. SVM shows a negative value for non-toxic and a positive value for toxic.

#### Supplementary Table 5

Screening peptides for ACEI activity

| Number | Smple     | Molecular mass (Da) | Amino acid number | ACEI rate (%) |
|--------|-----------|---------------------|-------------------|---------------|
| 1      | Captopril | /                   | /                 | 93.5          |
| 2      | APFPEVFGK | 990.52              | 9                 | 84            |
| 3      | QPPSPPPFL | 1075                | 10                | 77            |
| 4      | FLPYPY    | 798.4               | 6                 | 71            |
